# Supplementary material for: Characterization of flavor metabolites of cocultured fermented high acidity fruit wines, and the correlation between organic acids and esters
Source: Royal Society of Chemistry journal article supplement (doi:10.1039/d5ra04203h), 2026-01-01
Supplement: d5ra04203h1.pdf [file d5ra04203h1.pdf]

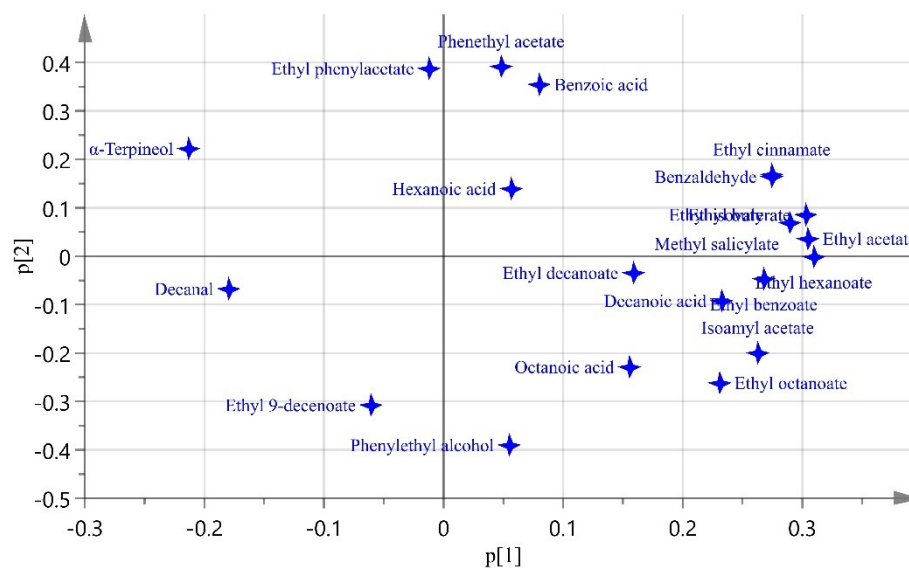

**Figure S1** Loadings scatter plot of PCA of volatile constituents of greengage wines by four *Saccharomyces* yeasts (odor activity value (OAV)>0.1).

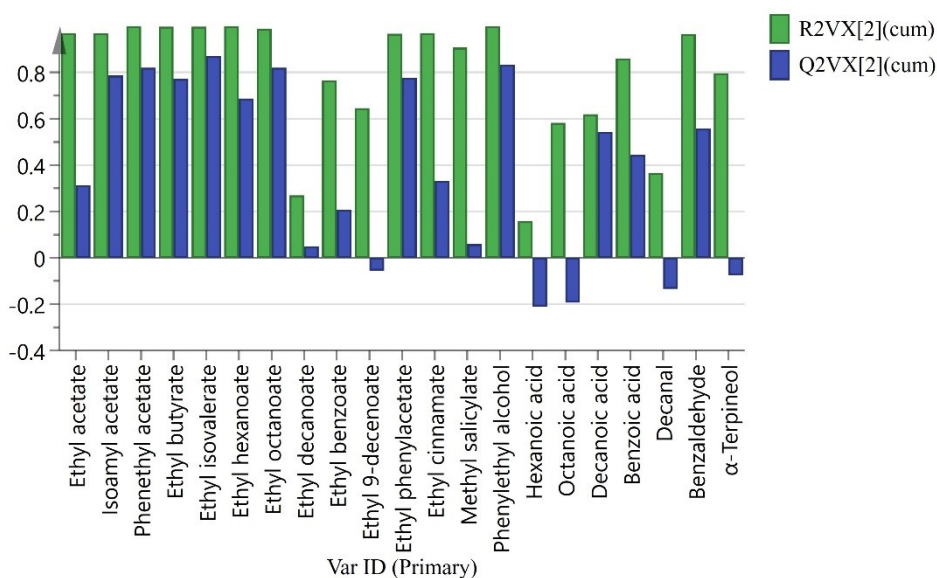

**Figure S2** X/Y overview plot of PCA of volatile constituents of greengage wines by four *Saccharomyces* yeasts (odor activity value (OAV)>0.1).

**Supplementary Table S1** The volatile constituents of fresh wines by different *Saccharomyces* yeasts (µg/L of methyl octanoate).

| Retention time (min) | Volatile constituents              | Identification method | RI    | Odor threshold    | Odor description        | <i>Saccharomyces cerevisiae</i> |                            |                             |                           |
|----------------------|------------------------------------|-----------------------|-------|-------------------|-------------------------|---------------------------------|----------------------------|-----------------------------|---------------------------|
|                      |                                    |                       |       |                   |                         | ScD254                          | ScK1                       | ScBV818                     | ScSY                      |
|                      | Esters (27)                        |                       |       |                   |                         |                                 |                            |                             |                           |
| 3.04                 | Ethyl acetate                      | NIST, RI              |       | 7500 <sup>1</sup> | Pineapple               | 603.76±100.79 <sup>b</sup>      | 682.39±44.88 <sup>b</sup>  | 1067.57±123.57 <sup>a</sup> | 593.38±43.36 <sup>b</sup> |
| 9.15                 | Isoamyl acetate                    | NIST, RI              | 1118  | 30 <sup>1</sup>   | Banana                  | ND                              | 22.37±1.09 <sup>b</sup>    | 35.36±5.21 <sup>a</sup>     | 21.37±1.40 <sup>b</sup>   |
| 29.19                | Phenethyl acetate                  | NIST, RI              | 1953  | 250 <sup>2</sup>  | Floral, rose, sweet     | 31.66±2.46 <sup>a</sup>         | 25.47±3.00 <sup>b</sup>    | 30.26±3.52 <sup>ab</sup>    | 27.66±0.79 <sup>ab</sup>  |
|                      | Acetate esters                     |                       |       |                   |                         | 635.42±103.21 <sup>b</sup>      | 730.22±47.42 <sup>b</sup>  | 1133.20±131.74 <sup>a</sup> | 642.41±41.16 <sup>b</sup> |
| 6.2                  | Ethyl butyrate                     | NIST, RI              | 1049  | 20 <sup>3</sup>   | Apple                   | ND                              | ND                         | 31.02±5.04 <sup>a</sup>     | ND                        |
| 6.68                 | Ethyl 2-methylbutanoate            | NIST, RI              | 1061  |                   |                         | ND                              | 15.46±2.07 <sup>b</sup>    | 28.87±3.57 <sup>a</sup>     | ND                        |
| 7.24                 | Ethyl isovalerate                  | NIST, RI              | 1074  | 3 <sup>4</sup>    | Apple, fruit, pineapple | ND                              | ND                         | 23.28±2.60 <sup>a</sup>     | ND                        |
| 13.23                | Ethyl hexanoate                    | NIST, RI              | 1220  | 5 <sup>1</sup>    | Flowery, fruity         | 63.63±1.67 <sup>c</sup>         | 86.21±5.91 <sup>b</sup>    | 168.85±13.26 <sup>a</sup>   | 85.54±3.16 <sup>b</sup>   |
| 15.66                | Ethyl 3-hexenoate                  | NIST, RI              | 1298  |                   |                         | 13.86±0.52 <sup>b</sup>         | 15.09±0.48 <sup>b</sup>    | 24.28±2.27 <sup>a</sup>     | 14.80±0.82 <sup>b</sup>   |
| 16.98                | Ethyl (L)-(-)-lactate              | NIST, RI              | 1350  |                   |                         | 21.05±2.45 <sup>b</sup>         | 28.97±6.24 <sup>a</sup>    | 25.34±1.16 <sup>ab</sup>    | 29.25±1.43 <sup>a</sup>   |
| 19.74                | Ethyl 2-hydroxyisovalerate         | NIST, RI              | 1464  |                   |                         | ND                              | ND                         | 13.81±0.68 <sup>b</sup>     | 16.85±1.06 <sup>a</sup>   |
| 20.18                | Ethyl octanoate                    | NIST, RI              | 1482  | 2 <sup>1</sup>    | Fruity, floral          | ND                              | 119.90±9.00 <sup>b</sup>   | 145.99±11.51 <sup>a</sup>   | 97.24±6.71 <sup>c</sup>   |
| 21.42                | Ethyl <i>trans</i> -4-octenoate    | NIST, RI              | 1540  |                   |                         | ND                              | ND                         | 16.68±0.89 <sup>a</sup>     | ND                        |
| 23.22                | Ethyl 2-hydroxy-4-methylpentanoate | NIST, RI              | 1627  |                   |                         | 26.37±2.40 <sup>b</sup>         | 31.96±4.10 <sup>b</sup>    | 48.96±3.76 <sup>a</sup>     | 50.68±2.54 <sup>a</sup>   |
| 25.46                | Ethyl methyl succinate             | NIST, RI              | 1743  |                   |                         | 20.85±3.17 <sup>a</sup>         | 22.60±5.03 <sup>a</sup>    | 23.85±2.47 <sup>a</sup>     | ND                        |
| 25.61                | Ethyl decanoate                    | NIST, RI              | 1751  | 200 <sup>3</sup>  | Fruity, fatty           | 31.71±0.98 <sup>b</sup>         | 53.10±3.09 <sup>a</sup>    | 54.87±8.23 <sup>a</sup>     | ND                        |
| 26.12                | Ethyl benzoate                     | NIST, RI              | 1778  | 53 <sup>5</sup>   | Sweet, medicinal        | 410.72±32.16 <sup>bc</sup>      | 461.66±30.20 <sup>ab</sup> | 513.20±42.88 <sup>a</sup>   | 391.81±18.25 <sup>c</sup> |
| 26.74                | Ethyl 9-decenoate                  | NIST, RI              | 1812  | 100 <sup>6</sup>  | Fruity                  | ND                              | 28.12±6.68 <sup>a</sup>    | ND                          | ND                        |
| 28.15                | Ethyl succinate                    | NIST, RI              | 1891  |                   |                         | ND                              | 47.75±8.16 <sup>a</sup>    | 27.77±6.81 <sup>b</sup>     | 24.98±0.75 <sup>b</sup>   |
| 28.51                | Ethyl hydrogen glutarate           | NIST, RI              | 1912  |                   |                         | 32.81±4.75 <sup>c</sup>         | 82.61±9.74 <sup>a</sup>    | 57.96±5.91 <sup>b</sup>     | 59.12±1.99 <sup>b</sup>   |
| 28.62                | Ethyl phenylacetate                | NIST, RI              | 1919  | 650 <sup>5</sup>  | Fruit, sweet            | 73.34±5.62 <sup>a</sup>         | 57.81±4.61 <sup>b</sup>    | 66.43±6.32 <sup>ab</sup>    | 60.52±1.79 <sup>b</sup>   |
| 28.78                | Ethyl butyl succinate              | NIST, RI              | 1928  |                   |                         | 24.74±2.16 <sup>b</sup>         | 31.70±2.86 <sup>a</sup>    | 35.23±3.28 <sup>a</sup>     | 32.46±0.28 <sup>a</sup>   |
| 30.8                 | Ethyl isopentyl succinate          | NIST, RI              | >2000 |                   |                         | 91.64±9.97 <sup>a</sup>         | 94.69±11.58 <sup>a</sup>   | 108.26±8.83 <sup>a</sup>    | 92.72±2.18 <sup>a</sup>   |

|       |                               |          |       |                     |                             |                             |                             |                             |                            |
|-------|-------------------------------|----------|-------|---------------------|-----------------------------|-----------------------------|-----------------------------|-----------------------------|----------------------------|
| 34.17 | Ethyl 3-hydroxytridecanoate   | NIST, RI | >2000 |                     |                             | ND                          | ND                          | ND                          | 32.41±1.56 <sup>a</sup>    |
| 34.65 | Ethyl cinnamate               | NIST, RI | >2000 | 1.1 <sup>4</sup>    | Honey,<br>cinnamon          | 217.71±25.25 <sup>b</sup>   | 200.09±21.71 <sup>b</sup>   | 274.18±29.55 <sup>a</sup>   | 195.93±5.57 <sup>b</sup>   |
|       | Ethyl esters                  |          |       |                     |                             | 1028.44±86.38 <sup>c</sup>  | 1377.73±112.28 <sup>b</sup> | 1688.83±136.99 <sup>a</sup> | 1184.32±42.60 <sup>c</sup> |
| 28.38 | Methyl salicylate             | NIST, RI | 1904  | 40 <sup>7</sup>     | Sweet,<br>wintergreen       | 42.13±4.44 <sup>ab</sup>    | 42.78±3.03 <sup>ab</sup>    | 48.93±5.35 <sup>a</sup>     | 40.48±2.18 <sup>b</sup>    |
| 33.17 | Diethyl malate                | NIST, RI | >2000 | 760000 <sup>8</sup> | Brown<br>sugar,<br>sweet    | 49.91±16.02 <sup>a</sup>    | 39.94±5.94 <sup>a</sup>     | 52.18±9.28 <sup>a</sup>     | 45.55±0.64 <sup>a</sup>    |
| 34.87 | Decanolactone                 | NIST, RI | >2000 |                     |                             | 24.60±3.78 <sup>a</sup>     | 22.22±3.80 <sup>a</sup>     | 25.34±1.33 <sup>a</sup>     | 22.33±0.31 <sup>a</sup>    |
|       | Total                         |          |       |                     |                             | 1780.50±203.94 <sup>c</sup> | 2212.89±165.15 <sup>b</sup> | 2948.48±282.47 <sup>a</sup> | 1935.09±3.28 <sup>bc</sup> |
|       | Alcohols (9)                  |          |       |                     |                             |                             |                             |                             |                            |
| 7.96  | Isobutyl alcohol              | NIST, RI | 1089  | 40000 <sup>8</sup>  | Alcohol,<br>winelike        | 43.22±7.34 <sup>b</sup>     | 83.27±13.56 <sup>a</sup>    | 94.64±13.56 <sup>a</sup>    | 87.28±6.94 <sup>a</sup>    |
| 9.85  | Butyl alcohol                 | NIST, RI | 1137  | 150000 <sup>8</sup> | Fruit                       | ND                          | 14.79±2.41 <sup>a</sup>     | 13.24±1.48 <sup>a</sup>     | 14.01±0.87 <sup>a</sup>    |
| 12.17 | Isoamyl alcohol               | NIST, RI | 1190  | 30000 <sup>1</sup>  | Whiskey,<br>nail polish     | 632.76±98.62 <sup>b</sup>   | 937.76±119.32 <sup>a</sup>  | 992.30±96.22 <sup>a</sup>   | 991.87±60.12 <sup>a</sup>  |
| 17.35 | Hexyl alcohol                 | NIST, RI | 1364  | 8000 <sup>1</sup>   | Green,<br>fruity            | 37.64±4.80 <sup>b</sup>     | 49.10±4.38 <sup>a</sup>     | 53.24±3.90 <sup>a</sup>     | 55.19±3.58 <sup>a</sup>    |
| 23.04 | [ <i>S,S</i> ]-2,3-Butanediol | NIST, RI | 1617  |                     |                             | 93.34±29.69 <sup>a</sup>    | 72.95±17.76 <sup>a</sup>    | 86.54±16.54 <sup>a</sup>    | 86.00±3.51 <sup>a</sup>    |
| 30.28 | Benzyl alcohol                | NIST, RI | >2000 | 200000 <sup>4</sup> | Sweet,<br>flower            | 290.45±51.70 <sup>a</sup>   | 171.42±28.32 <sup>b</sup>   | 174.87±13.11 <sup>b</sup>   | 149.32±0.58 <sup>b</sup>   |
| 30.91 | Phenylethyl alcohol           | NIST, RI | >2000 | 10000 <sup>9</sup>  | Rose,<br>pollen,<br>perfume | 1146.08±219.92 <sup>a</sup> | 1214.57±223.88 <sup>a</sup> | 1182.27±99.50 <sup>a</sup>  | 1193.15±1.98 <sup>a</sup>  |
| 31.91 | $\beta$ -Dihydroionol         | NIST, RI | >2000 |                     |                             | 86.50±16.68 <sup>b</sup>    | 112.91±13.53 <sup>a</sup>   | 113.23±4.21 <sup>a</sup>    | 125.66±2.03 <sup>a</sup>   |
| 30.71 | $\alpha$ -Ionol               | NIST, RI | >2000 |                     |                             | ND                          | ND                          | 25.16±0.94 <sup>a</sup>     | ND                         |
|       | Total                         |          |       |                     |                             | 2329.99±402.59 <sup>a</sup> | 2656.78±421.58 <sup>a</sup> | 2735.50±242.29 <sup>a</sup> | 2702.48±67.46 <sup>a</sup> |
|       | Acids (7)                     |          |       |                     |                             |                             |                             |                             |                            |
| 20.75 | Acetic acid                   | NIST, RI | 1507  | 200000 <sup>1</sup> | Sour                        | 144.62±17.81 <sup>a</sup>   | 104.46±18.68 <sup>b</sup>   | 126.68±12.78 <sup>ab</sup>  | 114.69±4.71 <sup>b</sup>   |
| 26.29 | 2-Methylbutyric acid          | NIST, RI | 1787  |                     |                             | 96.36±13.30 <sup>a</sup>    | 67.41±15.92 <sup>b</sup>    | 72.53±2.49 <sup>b</sup>     | 84.66±4.76 <sup>ab</sup>   |

|       |                          |          |       |                   |                     |                             |                              |                             |                              |
|-------|--------------------------|----------|-------|-------------------|---------------------|-----------------------------|------------------------------|-----------------------------|------------------------------|
| 29.79 | Hexanoic acid            | NIST, RI | 1988  | 420 <sup>4</sup>  | Cheese, fatty       | 175.92±29.49 <sup>ab</sup>  | 150.26±27.89 <sup>b</sup>    | 185.98±3.34 <sup>ab</sup>   | 203.63±2.44 <sup>a</sup>     |
| 33.51 | Octanoic acid            | NIST, RI | >2000 | 500 <sup>4</sup>  | Cheese, fatty acid  | 162.90±23.38 <sup>c</sup>   | 236.57±31.00 <sup>b</sup>    | 267.59±21.83 <sup>ab</sup>  | 291.08±6.74 <sup>a</sup>     |
| 36.84 | Decanoic acid            | NIST, RI | >2000 | 1000 <sup>8</sup> | Rancid, fat         | 98.74±24.45 <sup>b</sup>    | 131.13±40.89 <sup>ab</sup>   | 204.46±57.66 <sup>a</sup>   | 189.23±10.28 <sup>a</sup>    |
| 37.72 | 9-Hexadecenoic acid      | NIST, RI | >2000 |                   |                     | 22.20±6.18 <sup>b</sup>     | 53.04±10.95 <sup>a</sup>     | ND                          | ND                           |
| 39.17 | Benzoic acid             | NIST, RI | >2000 | 1000 <sup>2</sup> | Urine               | 319.10±108.94 <sup>a</sup>  | 225.04±53.38 <sup>a</sup>    | 301.63±62.34 <sup>a</sup>   | 217.57±13.14 <sup>a</sup>    |
|       | Total Aldehydes (3)      |          |       |                   |                     | 1019.84±205.65 <sup>a</sup> | 967.91±160.50 <sup>a</sup>   | 1158.87±52.71 <sup>a</sup>  | 1100.85±27.78 <sup>a</sup>   |
| 22.06 | Decanal                  | NIST, RI | 1570  | 1.25 <sup>2</sup> | Soap, orange peel   | 13.32±2.97 <sup>a</sup>     | 17.44±6.15 <sup>a</sup>      | ND                          | ND                           |
| 22.56 | Benzaldehyde             | NIST, RI | 1593  | 350 <sup>4</sup>  | Almond, burnt sugar | 165.76±12.90 <sup>b</sup>   | 126.32±14.50 <sup>c</sup>    | 272.73±13.30 <sup>a</sup>   | 170.86±11.90 <sup>b</sup>    |
| 29.09 | 2,4-Dimethylbenzaldehyde | NIST, RI | 1947  |                   |                     | 301.46±29.45 <sup>bc</sup>  | 273.27±27.50 <sup>c</sup>    | 368.43±18.36 <sup>a</sup>   | 324.55±3.41 <sup>b</sup>     |
|       | Total Ketones (2)        |          |       |                   |                     | 480.54±42.81 <sup>bc</sup>  | 417.02±46.27 <sup>c</sup>    | 641.15±30.09 <sup>a</sup>   | 495.41±15.31 <sup>b</sup>    |
| 31.45 | trans- $\beta$ -Ionone   | NIST, RI | >2000 |                   |                     | 49.80±4.72 <sup>b</sup>     | 38.63±4.28 <sup>c</sup>      | 62.18±5.26 <sup>a</sup>     | 56.92±3.39 <sup>ab</sup>     |
| 29.51 | Dihydro- $\beta$ -ionone | NIST, RI | 1972  |                   |                     | 19.77±2.61 <sup>b</sup>     | 18.75±1.97 <sup>b</sup>      | 28.53±1.95 <sup>a</sup>     | 21.78±0.43 <sup>b</sup>      |
|       | Total Phenols (3)        |          |       |                   |                     | 69.57±7.33 <sup>b</sup>     | 57.37±6.20 <sup>c</sup>      | 90.71±7.12 <sup>a</sup>     | 78.70±3.82 <sup>b</sup>      |
| 25.9  | cis-Ocimenol             | NIST, RI | 1767  |                   |                     | 69.29±12.58 <sup>a</sup>    | 49.91±4.99 <sup>a</sup>      | 54.84±14.42 <sup>a</sup>    | 50.74±5.08 <sup>a</sup>      |
| 35.2  | 3-Allylguaiaicol         | NIST, RI | >2000 |                   |                     | 61.97±11.74 <sup>ab</sup>   | 67.39±0.85 <sup>a</sup>      | 52.75±2.72 <sup>b</sup>     | 53.41±2.31 <sup>b</sup>      |
| 21.11 | 1,2-Oxolinalool          | NIST, RI | 1525  |                   |                     | 21.81±1.80 <sup>a</sup>     | 23.58±6.84 <sup>a</sup>      | 19.85±3.65 <sup>a</sup>     | 25.11±1.13 <sup>a</sup>      |
|       | Total Terpenes (1)       |          |       |                   |                     | 153.07±25.09 <sup>a</sup>   | 140.89±11.97 <sup>a</sup>    | 127.43±20.70 <sup>a</sup>   | 129.26±8.52 <sup>a</sup>     |
| 24.93 | $\alpha$ -Terpineol      | NIST, RI | 1714  | 100 <sup>1</sup>  | Citrus              | 24.62±8.73 <sup>a</sup>     | ND                           | ND                          | 20.43±1.86 <sup>a</sup>      |
|       | Total                    |          |       |                   |                     | 24.62±8.73 <sup>a</sup>     | ND                           | ND                          | 20.43±1.86 <sup>a</sup>      |
|       | Total volatiles          |          |       |                   |                     | 5858.14±883.53 <sup>b</sup> | 6452.86±798.39 <sup>ab</sup> | 7702.14±589.83 <sup>a</sup> | 6462.22±124.31 <sup>ab</sup> |

<sup>a</sup> Data are the means  $\pm$  standard deviation (n=3)

<sup>b</sup> Values in the same row with different letters indicate significant differences ( $P < 0.05$ ) by Duncan's tests

<sup>c</sup> RI, Retention indices, were determined by using n-alkanes C<sub>8</sub>-C<sub>20</sub>

<sup>d</sup> OAVs, Odor activity values, were calculated from divided volatile constituent concentration by volatiles odor threshold

<sup>e</sup> Odor description reported in the <http://www.flavornet.org/flavornet.html> and <http://www.thegoodscentcompany.com/search2.html>

<sup>f</sup> ND, not detected

<sup>g</sup> Column type: HP-Innowax (30 m × 0.25 mm × 0.25 μm, Agilent Technologies)

**Supplementary Table S2.** The volatile constituents of fresh wines by coculturing *Saccharomyces* yeasts with *T. delbrueckii* (µg/L of methyl octanoate).

| No. | Retention<br>time<br>(min) | Volatile<br>constituents | Identification<br>method | RI    | Odor<br>threshold   | Odor<br>description | Single culture       |                      |                       | Simultaneous inoculation |                      |                       | Sequential inoculation |                      |                      |
|-----|----------------------------|--------------------------|--------------------------|-------|---------------------|---------------------|----------------------|----------------------|-----------------------|--------------------------|----------------------|-----------------------|------------------------|----------------------|----------------------|
|     |                            |                          |                          |       |                     |                     | ScK1                 | ScBV818              | ScSY                  | ScK1+Td_Si               | ScBV818+Td<br>_Si    | ScSY+Td_Si            | ScK1+Td_Se             | ScBV818+Td<br>_Se    | ScSY+Td<br>_Se       |
|     |                            | Esters (24)              |                          |       |                     |                     | 687.36 <sup>c</sup>  | 779.03 <sup>bc</sup> | 767.28 <sup>bc</sup>  | 948.43 <sup>b</sup>      | 1154.19 <sup>a</sup> | 642.62 <sup>c</sup>   | 920.79 <sup>b</sup>    | 797.74 <sup>bc</sup> | 646.45 <sup>c</sup>  |
| E1  | 6.88                       | Isoamyl acetate          | NIST, RI                 | 1066  | 30 <sup>1</sup>     | Banana              | 4.32 <sup>a</sup>    | 5.10 <sup>a</sup>    | ND                    | ND                       | ND                   | ND                    | ND                     | 5.21 <sup>a</sup>    | ND                   |
| E2  | 27.16                      | Benzyl acetate           | NIST, RI                 | 1836  |                     |                     | 3.76 <sup>bc</sup>   | ND                   | 2.82 <sup>c</sup>     | 4.77 <sup>ab</sup>       | 4.00 <sup>bc</sup>   | 3.24 <sup>c</sup>     | 5.66 <sup>a</sup>      | 3.86 <sup>bc</sup>   | 3.11 <sup>c</sup>    |
| E3  | 28.88                      | Phenethyl acetate        | NIST, RI                 | 1934  | 250 <sup>2</sup>    | Floral, rose, sweet | ND                   | ND                   | ND                    | ND                       | 58.48 <sup>a</sup>   | ND                    | ND                     | ND                   | ND                   |
|     |                            | Acetate esters           |                          |       |                     |                     | 8.08 <sup>bc</sup>   | 5.10 <sup>bc</sup>   | 2.82 <sup>c</sup>     | 4.77 <sup>bc</sup>       | 62.48 <sup>a</sup>   | 3.24 <sup>c</sup>     | 5.66 <sup>bc</sup>     | 9.07 <sup>b</sup>    | 3.11 <sup>c</sup>    |
| E4  | 12.07                      | Ethyl hexanoate          | NIST, RI                 | 1188  | 5 <sup>1</sup>      | Flowery, fruity     | ND                   | ND                   | 40.08 <sup>a</sup>    | 26.77 <sup>b</sup>       | 28.50 <sup>b</sup>   | ND                    | ND                     | ND                   | ND                   |
| E5  | 15.01                      | Ethyl 3-hexenoate        | NIST, RI                 | 1278  |                     |                     | ND                   | 5.16 <sup>b</sup>    | 8.51 <sup>a</sup>     | 4.10 <sup>b</sup>        | 4.93 <sup>b</sup>    | 3.55 <sup>b</sup>     | ND                     | 5.47 <sup>b</sup>    | ND                   |
| E6  | 16.7                       | Ethyl lactate            | NIST, RI                 | 1339  | 14000 <sup>10</sup> | Fruit               | 13.91 <sup>abc</sup> | 17.94 <sup>ab</sup>  | 15.52 <sup>abc</sup>  | 10.42 <sup>c</sup>       | 11.85 <sup>bc</sup>  | 14.25 <sup>abc</sup>  | 15.99 <sup>abc</sup>   | 19.57 <sup>a</sup>   | 15.07 <sup>abc</sup> |
| E7  | 19.68                      | Ethyl octanoate          | NIST, RI                 | 1461  | 2 <sup>1</sup>      | Fruity, floral      | ND                   | ND                   | 96.58 <sup>a</sup>    | 54.30 <sup>bc</sup>      | 73.75 <sup>b</sup>   | ND                    | ND                     | 37.72 <sup>c</sup>   | ND                   |
| E8  | 21.01                      | Ethyl 7-octenoate        | NIST, RI                 | 1520  |                     |                     | ND                   | ND                   | ND                    | ND                       | 6.57 <sup>a</sup>    | ND                    | ND                     | ND                   | ND                   |
| E9  | 22.94                      | Ethyl DL-leucate         | NIST, RI                 | 1612  |                     |                     | ND                   | ND                   | ND                    | ND                       | 17.94 <sup>a</sup>   | ND                    | ND                     | ND                   | ND                   |
| E10 | 25.76                      | Ethyl benzoate           | NIST, RI                 | 1759  | 53 <sup>5</sup>     | Sweet, medicinal    | 145.41 <sup>cd</sup> | 189.29 <sup>bc</sup> | 67.66 <sup>e</sup>    | 216.56 <sup>b</sup>      | 178.69 <sup>bc</sup> | 73.70 <sup>e</sup>    | 281.22 <sup>a</sup>    | 181.47 <sup>bc</sup> | 91.14 <sup>de</sup>  |
| E11 | 26.35                      | Ethyl 9-decenoate        | NIST, RI                 | 1790  | 100 <sup>6</sup>    | Fruity              | ND                   | ND                   | 13.69 <sup>b</sup>    | 24.98 <sup>a</sup>       | ND                   | ND                    | ND                     | ND                   | ND                   |
| E12 | 28.3                       | Ethyl phenylacetate      | NIST, RI                 | 1899  | 650 <sup>5</sup>    | Fruit, sweet        | 11.54 <sup>ab</sup>  | 12.15 <sup>ab</sup>  | 11.68 <sup>ab</sup>   | 15.30 <sup>ab</sup>      | 15.77 <sup>a</sup>   | 10.98 <sup>b</sup>    | 12.76 <sup>ab</sup>    | 11.11 <sup>b</sup>   | 12.20 <sup>ab</sup>  |
| E13 | 29.35                      | Ethyl dodecanoate        | NIST, RI                 | 1962  | 5900 <sup>5</sup>   | Sweet, medicinal    | 5.01 <sup>d</sup>    | 7.99 <sup>bc</sup>   | 10.39 <sup>ab</sup>   | 12.23 <sup>a</sup>       | 5.77 <sup>cd</sup>   | 5.76 <sup>cd</sup>    | 4.32 <sup>de</sup>     | 2.21 <sup>e</sup>    | 6.38 <sup>cd</sup>   |
| E14 | 30.15                      | Ethyl hydrocinnamate     | NIST, RI                 | >2000 |                     |                     | 1.67 <sup>a</sup>    | ND                   | ND                    | ND                       | 1.69 <sup>a</sup>    | ND                    | ND                     | ND                   | ND                   |
| E15 | 34.33                      | Ethyl cinnamate          | NIST, RI                 | >2000 | 1.1 <sup>4</sup>    | Honey, cinnamon     | 92.43 <sup>c</sup>   | 143.15 <sup>a</sup>  | 117.59 <sup>abc</sup> | 110.38 <sup>bc</sup>     | 133.05 <sup>ab</sup> | 113.36 <sup>abc</sup> | 116.16 <sup>abc</sup>  | 95.71 <sup>c</sup>   | 102.70 <sup>bc</sup> |

|     |       |                          |          |       |                      |                       |                      |                       |                       |                       |                      |                      |                       |                      |                      |
|-----|-------|--------------------------|----------|-------|----------------------|-----------------------|----------------------|-----------------------|-----------------------|-----------------------|----------------------|----------------------|-----------------------|----------------------|----------------------|
| E16 | 38.25 | Ethyl hydrogen succinate | NIST, RI | >2000 |                      |                       | ND                   | ND                    | ND                    | 7.75 <sup>a</sup>     | 6.36 <sup>bc</sup>   | 3.08 <sup>d</sup>    | 5.92 <sup>c</sup>     | 7.61 <sup>ab</sup>   | 7.56 <sup>ab</sup>   |
|     |       | Ethyl esters             |          |       |                      |                       | 269.96 <sup>c</sup>  | 375.68 <sup>b</sup>   | 381.70 <sup>b</sup>   | 482.79 9 <sup>a</sup> | 484.86 <sup>a</sup>  | 224.68 <sup>c</sup>  | 436.37 <sup>ab</sup>  | 360.87 <sup>b</sup>  | 235.05 <sup>c</sup>  |
| E17 | 28.06 | Methyl salicylate        | NIST, RI | 1886  | 40 <sup>7</sup>      | Sweet, wintergreen    | ND                   | ND                    | ND                    | 29.11 <sup>a</sup>    | 18.60 <sup>b</sup>   | ND                   | ND                    | 1.02 <sup>c</sup>    | ND                   |
| E18 | 35.61 | Methyl hexadecanoate     | NIST, RI | >2000 |                      |                       | ND                   | ND                    | ND                    | ND                    | 4.37 <sup>a</sup>    | ND                   | ND                    | ND                   | ND                   |
| E19 | 40.09 | Methyl linoleate         | NIST, RI | >2000 |                      |                       | ND                   | ND                    | 1.08 <sup>a</sup>     | ND                    | ND                   | ND                   | ND                    | ND                   | ND                   |
| E20 | 34.52 | γ-Decalactone            | NIST, RI | >2000 | 5 <sup>5</sup>       | Peach, fat            | ND                   | ND                    | ND                    | ND                    | ND                   | ND                   | 66.17 <sup>a</sup>    | ND                   | ND                   |
| E21 | 35.28 | δ-Decalactone            | NIST, RI | >2000 | 100 <sup>5</sup>     | Coconut               | ND                   | ND                    | 4.27 <sup>a</sup>     | ND                    | ND                   | 2.10 <sup>c</sup>    | 3.04 <sup>b</sup>     | 1.52 <sup>c</sup>    | 3.08 <sup>b</sup>    |
| E22 | 37.99 | γ-Dodecalactone          | NIST, RI | >2000 |                      |                       | 3.42 <sup>b</sup>    | ND                    | 4.30 <sup>a</sup>     | ND                    | ND                   | ND                   | ND                    | ND                   | ND                   |
| E23 | 38.71 | δ-Dodecalactone          | NIST, RI | >2000 |                      |                       | ND                   | ND                    | ND                    | ND                    | ND                   | ND                   | ND                    | ND                   | 1.55 <sup>a</sup>    |
| E24 | 26.09 | Diethyl succinate        | NIST, RI | 1777  | 200000 <sup>4</sup>  | Wine, fruit           | 405.90 <sup>b</sup>  | 398.24 <sup>b</sup>   | 373.10 <sup>b</sup>   | 431.77 <sup>b</sup>   | 583.87 <sup>a</sup>  | 412.60 <sup>b</sup>  | 409.54 <sup>b</sup>   | 425.27 <sup>b</sup>  | 403.67 <sup>b</sup>  |
|     |       | Alcohols (11)            |          |       |                      |                       | 1549.20 <sup>a</sup> | 1479.05 <sup>a</sup>  | 1736.78 <sup>a</sup>  | 1734.99 <sup>a</sup>  | 1694.36 <sup>a</sup> | 1647.42 <sup>a</sup> | 1715.07 <sup>a</sup>  | 1590.62 <sup>a</sup> | 1886.16 <sup>a</sup> |
| A1  | 6.48  | Isobutyl alcohol         | NIST, RI | 1056  | 40000 <sup>8</sup>   | Alcohol, winelike     | 23.57 <sup>b</sup>   | 2.31 <sup>c</sup>     | 22.53 <sup>b</sup>    | ND                    | 29.81 <sup>ab</sup>  | 1.78 <sup>c</sup>    | 3.37 <sup>c</sup>     | 6.68 <sup>c</sup>    | 36.37 <sup>a</sup>   |
| A2  | 8.56  | Butyl alcohol            | NIST, RI | 1101  | 150000 <sup>8</sup>  | Fruit                 | ND                   | ND                    | 16.09 <sup>a</sup>    | 9.51 <sup>b</sup>     | 8.77 <sup>b</sup>    | ND                   | ND                    | ND                   | ND                   |
| A3  | 11.63 | Isopentyl alcohol        | NIST, RI | 1179  | 30000 <sup>1</sup>   | Whiskey, nail polish  | 383.37 <sup>b</sup>  | 404.80 <sup>b</sup>   | 560.08 <sup>a</sup>   | 395.49 <sup>b</sup>   | 352.70 <sup>b</sup>  | 432.65 <sup>ab</sup> | 442.09 <sup>ab</sup>  | 478.53 <sup>ab</sup> | 460.14 <sup>ab</sup> |
| A4  | 16.94 | Hexyl alcohol            | NIST, RI | 1349  | 8000 <sup>1</sup>    | Green, fruity         | 31.85 <sup>c</sup>   | 37.78 <sup>bc</sup>   | 47.45 <sup>a</sup>    | 32.60 <sup>c</sup>    | 30.40 <sup>c</sup>   | 42.31 <sup>ab</sup>  | 37.52 <sup>bc</sup>   | 30.84 <sup>c</sup>   | 33.51 <sup>bc</sup>  |
| A5  | 23.25 | Octyl alcohol            | NIST, RI | 1628  | 200 <sup>5</sup>     | Moss, nut, mushroom   | 16.10 <sup>a</sup>   | 14.30 <sup>ab</sup>   | 12.80 <sup>abc</sup>  | ND                    | ND                   | 11.64 <sup>bc</sup>  | 12.22 <sup>abc</sup>  | 10.26 <sup>c</sup>   | ND                   |
| A6  | 23.82 | 2,3-Butanediol           | NIST, RI | 1658  | 120000 <sup>11</sup> | Cream, floral, fruit  | 5.60 <sup>de</sup>   | 17.19 <sup>c</sup>    | 29.84 <sup>b</sup>    | 6.58 <sup>de</sup>    | 50.26 <sup>a</sup>   | 8.56 <sup>d</sup>    | ND                    | 25.62 <sup>b</sup>   | 11.71 <sup>cd</sup>  |
| A7  | 25.68 | Nonyl alcohol            | NIST, RI | 1755  | 600 <sup>3</sup>     | Fat, green            | ND                   | ND                    | 2.73 <sup>b</sup>     | 6.90 <sup>a</sup>     | 5.62 <sup>c</sup>    | ND                   | ND                    | ND                   | ND                   |
| A8  | 30.04 | Benzyl alcohol           | NIST, RI | >2000 | 200000 <sup>4</sup>  | Sweet, flower         | 105.19 <sup>bc</sup> | 140.95 <sup>abc</sup> | 121.07 <sup>abc</sup> | 144.79 <sup>ab</sup>  | 167.07 <sup>a</sup>  | 115.69 <sup>bc</sup> | 122.12 <sup>abc</sup> | 94.27 <sup>c</sup>   | 94.48 <sup>c</sup>   |
| A9  | 30.66 | Phenethyl alcohol        | NIST, RI | >2000 | 10000 <sup>11</sup>  | Rose, pollen, perfume | 977.48 <sup>a</sup>  | 853.70 <sup>a</sup>   | 924.19 <sup>a</sup>   | 1139.11 <sup>a</sup>  | 1039.56 <sup>a</sup> | 1029.24 <sup>a</sup> | 1097.74 <sup>a</sup>  | 937.32 <sup>a</sup>  | 1241.29 <sup>a</sup> |
| A10 | 32.94 | Hydrocinnamyl alcohol    | NIST, RI | >2000 |                      |                       | 6.05 <sup>b</sup>    | ND                    | ND                    | ND                    | ND                   | 5.54 <sup>b</sup>    | ND                    | ND                   | 8.66 <sup>a</sup>    |

|     |       |                              |          |       |                     |                         |                       |                      |                      |                      |                      |                      |                      |                      |                       |
|-----|-------|------------------------------|----------|-------|---------------------|-------------------------|-----------------------|----------------------|----------------------|----------------------|----------------------|----------------------|----------------------|----------------------|-----------------------|
| A11 | 30.37 | $\alpha$ -Ionol              | NIST, RI | >2000 |                     |                         | ND                    | 8.01 <sup>b</sup>    | ND                   | ND                   | 10.16 <sup>a</sup>   | ND                   | ND                   | 7.09 <sup>b</sup>    | ND                    |
|     |       | Acids (8)                    |          |       |                     |                         | 622.89 <sup>bc</sup>  | 626.92 <sup>bc</sup> | 856.08 <sup>ab</sup> | 594.28 <sup>c</sup>  | 597.73 <sup>c</sup>  | 938.19 <sup>a</sup>  | 495.78 <sup>c</sup>  | 588.29 <sup>c</sup>  | 672.57 <sup>bc</sup>  |
| C1  | 20.53 | Acetic acid                  | NIST, RI | 1497  | 200000 <sup>1</sup> | Sour                    | 104.12 <sup>abc</sup> | 153.30 <sup>a</sup>  | 100.08 <sup>ab</sup> | 97.71 <sup>abc</sup> | 56.09 <sup>c</sup>   | 134.95 <sup>ab</sup> | 98.24 <sup>abc</sup> | 134.75 <sup>ab</sup> | 79.49 <sup>bc</sup>   |
| C2  | 29.52 | Hexanoic acid                | NIST, RI | 1972  | 420 <sup>4</sup>    | Cheese, fatty           | 137.71 <sup>bc</sup>  | ND                   | 202.69 <sup>ab</sup> | 106.79 <sup>c</sup>  | 106.38 <sup>c</sup>  | 242.50 <sup>a</sup>  | ND                   | 118.44 <sup>c</sup>  | 180.91 <sup>abc</sup> |
| C3  | 33.23 | Octanoic acid                | NIST, RI | >2000 | 500 <sup>4</sup>    | Cheese, fatty acid      | 232.87 <sup>c</sup>   | 236.85 <sup>c</sup>  | 359.35 <sup>a</sup>  | 205.34 <sup>c</sup>  | 248.90 <sup>bc</sup> | 330.02 <sup>ab</sup> | 253.32 <sup>bc</sup> | 199.63 <sup>c</sup>  | 224.88 <sup>c</sup>   |
| C4  | 36.56 | Decanoic acid                | NIST, RI | >2000 | 1000 <sup>8</sup>   | Rancid, fat             | 111.03 <sup>a</sup>   | 156.81 <sup>a</sup>  | 167.22 <sup>a</sup>  | 114.10 <sup>a</sup>  | 144.09 <sup>a</sup>  | 173.51 <sup>a</sup>  | 117.51 <sup>a</sup>  | 107.74 <sup>a</sup>  | 116.80 <sup>a</sup>   |
| C5  | 37.48 | 9-Decenoic acid              | NIST, RI | >2000 |                     |                         | 15.08 <sup>b</sup>    | ND                   | ND                   | 22.09 <sup>a</sup>   | 7.18 <sup>c</sup>    | ND                   | 19.88 <sup>ab</sup>  | 6.93 <sup>c</sup>    | ND                    |
| C6  | 39.12 | Benzoic acid                 | NIST, RI | >2000 | 1000 <sup>2</sup>   | Urine                   | 18.14 <sup>b</sup>    | 34.68 <sup>a</sup>   | ND                   | ND                   | 28.66 <sup>a</sup>   | 18.75 <sup>b</sup>   | ND                   | 20.80 <sup>b</sup>   | 33.13 <sup>a</sup>    |
| C7  | 39.58 | Dodecanoic acid              | NIST, RI | >2000 | 1000 <sup>3</sup>   | Metal                   | ND                    | 45.29 <sup>a</sup>   | 26.73 <sup>c</sup>   | 39.28 <sup>ab</sup>  | ND                   | 35.05 <sup>abc</sup> | ND                   | ND                   | 32.70 <sup>bc</sup>   |
| C8  | 43.05 | Tetradecanoic acid           | NIST, RI | >2000 | 10000 <sup>5</sup>  | Burnt, cheese, harsh    | 3.95 <sup>c</sup>     | ND                   | ND                   | 8.99 <sup>a</sup>    | 6.42 <sup>b</sup>    | 3.42 <sup>c</sup>    | 6.84 <sup>ab</sup>   | ND                   | 4.65 <sup>bc</sup>    |
|     |       | Aldehydes (4)                |          |       |                     |                         | 390.94 <sup>a</sup>   | 244.98 <sup>b</sup>  | 163.76 <sup>c</sup>  | 88.80 <sup>d</sup>   | 199.07 <sup>bc</sup> | 4.51 <sup>e</sup>    | 72.97 <sup>d</sup>   | 58.22 <sup>d</sup>   | 56.90 <sup>d</sup>    |
| L1  | 21.63 | Decanal                      | NIST, RI | 1550  | 1.25 <sup>2</sup>   | Soap, orange peel       | 202.21 <sup>a</sup>   | 174.25 <sup>a</sup>  | 5.34 <sup>b</sup>    | ND                   | 4.49 <sup>b</sup>    | 3.51 <sup>b</sup>    | ND                   | 10.01 <sup>b</sup>   | 9.69 <sup>b</sup>     |
| L2  | 22.27 | Benzaldehyde                 | NIST, RI | 1580  | 350 <sup>4</sup>    | Almond, burnt sugar     | 107.84 <sup>c</sup>   | 70.73 <sup>d</sup>   | 158.41 <sup>b</sup>  | 78.15 <sup>d</sup>   | 183.89 <sup>a</sup>  | ND                   | 61.31 <sup>de</sup>  | 48.22 <sup>e</sup>   | 45.46 <sup>e</sup>    |
| L3  | 25.32 | <i>m</i> -Tolualdehyde       | NIST, RI | 1736  |                     |                         | 53.92 <sup>a</sup>    | ND                   | ND                   | 10.65 <sup>b</sup>   | 10.69 <sup>b</sup>   | ND                   | 10.57 <sup>b</sup>   | ND                   | ND                    |
| L4  | 32.64 | Coconut aldehyde             | NIST, RI | >2000 |                     |                         | 26.96 <sup>a</sup>    | ND                   | ND                   | ND                   | ND                   | 1.00 <sup>b</sup>    | 1.09 <sup>b</sup>    | ND                   | 1.76 <sup>b</sup>     |
|     |       | Ketones (3)                  |          |       |                     |                         | 13.48 <sup>c</sup>    | 106.30 <sup>ab</sup> | 108.91 <sup>ab</sup> | ND                   | 105.31 <sup>ab</sup> | 121.83 <sup>a</sup>  | ND                   | ND                   | 94.19 <sup>b</sup>    |
| K1  | 29.11 | Dihydro- $\beta$ -ionone     | NIST, RI | 1948  |                     |                         | 13.48 <sup>a</sup>    | ND                   | 17.11 <sup>a</sup>   | ND                   | ND                   | 16.05 <sup>a</sup>   | ND                   | ND                   | 12.81 <sup>a</sup>    |
| K2  | 31.07 | $\beta$ -Ionone              | NIST, RI | >2000 | 0.09 <sup>4</sup>   | Seaweed, violet, flower | ND                    | 106.30 <sup>a</sup>  | 91.80 <sup>ab</sup>  | ND                   | 93.83 <sup>ab</sup>  | 105.78 <sup>a</sup>  | ND                   | ND                   | 81.38 <sup>b</sup>    |
| K3  | 32.16 | 3,4-Dehydro- $\beta$ -ionone | NIST, RI | >2000 |                     |                         | ND                    | ND                   | ND                   | ND                   | 11.48 <sup>a</sup>   | ND                   | ND                   | ND                   | ND                    |
|     |       | Phenols (1)                  |          |       |                     |                         | 25.51 <sup>a</sup>    | ND                   | ND                   | ND                   | 32.18 <sup>a</sup>   | 28.28 <sup>a</sup>   | 33.52 <sup>a</sup>   | 28.33 <sup>a</sup>   | 30.74 <sup>a</sup>    |
| P1  | 34.94 | Eugenol                      | NIST, RI | >2000 | 6 <sup>4</sup>      | Clove, honey            | 25.51 <sup>a</sup>    | ND                   | ND                   | ND                   | 32.18 <sup>a</sup>   | 28.28 <sup>a</sup>   | 33.52 <sup>a</sup>   | 28.33 <sup>a</sup>   | 30.74 <sup>a</sup>    |



|    |       |                     |          |      |                  |                     |                      |                      |                      |                      |                      |                      |                      |                      |                      |
|----|-------|---------------------|----------|------|------------------|---------------------|----------------------|----------------------|----------------------|----------------------|----------------------|----------------------|----------------------|----------------------|----------------------|
|    |       | Terpenes (2)        |          |      |                  |                     | 140.90 <sup>a</sup>  | 152.88 <sup>a</sup>  | 36.01 <sup>b</sup>   | 170.55 <sup>a</sup>  | 171.11 <sup>a</sup>  | 146.09 <sup>a</sup>  | 155.03 <sup>a</sup>  | 137.49 <sup>a</sup>  | 131.04 <sup>a</sup>  |
| T1 | 23.04 | Linalool            | NIST, RI | 1617 | 3 <sup>5</sup>   | Flower,<br>lavender | 36.64 <sup>ab</sup>  | 35.23 <sup>ab</sup>  | 36.01 <sup>ab</sup>  | 41.28 <sup>ab</sup>  | 44.87 <sup>a</sup>   | 33.86 <sup>b</sup>   | 39.76 <sup>ab</sup>  | 32.46 <sup>b</sup>   | 14.70 <sup>c</sup>   |
| T2 | 26.45 | $\alpha$ -Terpineol | NIST, RI | 1795 | 100 <sup>1</sup> | Citrus              | 104.26 <sup>a</sup>  | 117.65 <sup>a</sup>  | ND                   | 129.27 <sup>a</sup>  | 126.24 <sup>a</sup>  | 112.23 <sup>a</sup>  | 115.27 <sup>a</sup>  | 105.03 <sup>a</sup>  | 116.34 <sup>a</sup>  |
|    |       | Total volatiles     |          |      |                  |                     | 3430.28 <sup>a</sup> | 3389.15 <sup>a</sup> | 3668.81 <sup>a</sup> | 3537.06 <sup>a</sup> | 3953.93 <sup>a</sup> | 3528.94 <sup>a</sup> | 3393.16 <sup>a</sup> | 3200.69 <sup>a</sup> | 3518.06 <sup>a</sup> |

<sup>a</sup> Data are the means  $\pm$  standard deviation (n=3)

<sup>b</sup> Values in the same row with different letters indicate significant differences ( $P < 0.05$ ) by Duncan's tests

<sup>c</sup> RI, Retention indices, were determined by using n-alkanes C<sub>8</sub>-C<sub>20</sub>

<sup>d</sup> OAVs, Odor activity values, were calculated from divided volatile constituent concentration by volatiles odor threshold

<sup>e</sup> Odor description reported in the <http://www.flavornet.org/flavornet.html> and <http://www.thegoodscentcompany.com/search2.html>

<sup>f</sup> ND, not detected

<sup>g</sup> Column type: HP-Innowax (30 m  $\times$  0.25 mm  $\times$  0.25  $\mu$ m, Agilent Technologies)

## References

- 1 H. Guth, Quantitation and sensory studies of character impact odorants of different white wine varieties, *J. Agr. Food Chem.*, 1997, 45, 3027-3032. (Thresholds were in a water/ethanol (90/10) solution.)
- 2 L. Cullere, A. Escudero, J. Cacho, & V. Ferreira, Gas chromatography-olfactometry and chemical quantitative study of the aroma of six premium quality Spanish aged red wines, *J. Agr. Food Chem.*, 2004, 52(6), 1653-1660. (Thresholds were in 10% ethanol/water mixture containing 5 g/L tartaric acid at pH 3.4.)
- 3 C. T. Peng, Y. Wen, Y. S. Tao, & Y. Y. Lan, Modulating the formation of Meili wine aroma by prefermentative freezing process, *J. Agr. Food Chem.*, 2013, 61, 1542-1553. (Thresholds were in 12% ethanol/water mixture containing 5 g/L tartaric acid at pH 3.2.)
- 4 V. Ferreira, R. Lopez, & J. F. Cacho, Quantitative determination of the odorants of young red wines from different grape varieties, *J. Sci. Food Agric.*, 2000, 80(11), 1659-1667. (Thresholds were in a synthetic wine, 11% ethanol, v/v, 7 g/L glycerine, 5 g/L tartaric acid, pH 3.4.)
- 5 J. A. Pino, & O. Queris, Analysis of volatile compounds of mango wine, *Food Chem.*, 2011, 125(4), 1141-1146. (Thresholds were measured in the laboratory, in 11% ethanol/water mixture.)
- 6 Y. S. Tao, & L. Zhang, Intensity prediction of typical aroma characters of Cabernet Sauvignon wine in Changli County (China), *LWT*, 2010, 43, 1550-1556. (Thresholds were calculated in 9.72 g/100 g ethanol/water mixture containing 5 g/L tartaric acid at pH 3.2.)
- 7 R. G. Buttery, R. M. Seifert, D. G. Guadagni, & L. C. Ling, Characterization of some volatile constituents of bell peppers, *J. Agr. Food Chem.*, 1969, 17(6), 1322-1327. (Thresholds were in ethanol/water mixture.)
- 8 P. X. Etievant, "Wine," in *Volatile Compounds of Food and Beverages*, ed. H. Maarse, New York, NY: Dekker, 1991, 483-546. (Thresholds were in 12% ethanol/water mixture.)
- 9 X. C. Wang, A. H. Li, M. Dizy, N. Ullah, W. X. Sun, & Y. S. Tao, Evaluation of aroma enhancement for "Ecolly" dry white wines by mixed inoculation of selected *Rhodotorula mucilaginosa* and *Saccharomyces cerevisiae*, *Food Chem.*, 2017, 228, 550-559. (Thresholds were measured in the laboratory, in 11% ethanol/water mixture at pH 3.2.)
- 10 H. Li, *Wine tasting*, China Science Press, Beijing, 2006, 29-106. (Thresholds were calculated in a 12% ethanol/water mixture.)

- 11 R. Lopez, E. Ezpeleta, I. Sanchez, J. Cacho, & V. Ferreira, Analysis of the aroma intensities of volatile compounds released from mild acid hydrolysates of odorless precursors extracted from Tempranillo and Grenache grapes using gas chromatography-olfactometry. Food Chem.,2004, 88, 95e103. (Thresholds were in a synthetic wine, 11% ethanol, v/v, 7 g/L glycerine, 5 g/L tartaric acid, pH 3.4.)
